# Supplementary material for: Suicide and Self-Harm in Youth Presenting to a US Rural Hospital During COVID-19
Source: Oxford University Press journal article supplement (doi:10.1542/hpeds.2022-006635), 2022-09-27
Supplement: hpeds.2022-006635supplementarydata.pdf [file hpeds.2022-006635supplementarydata.pdf]

## Supplemental Information

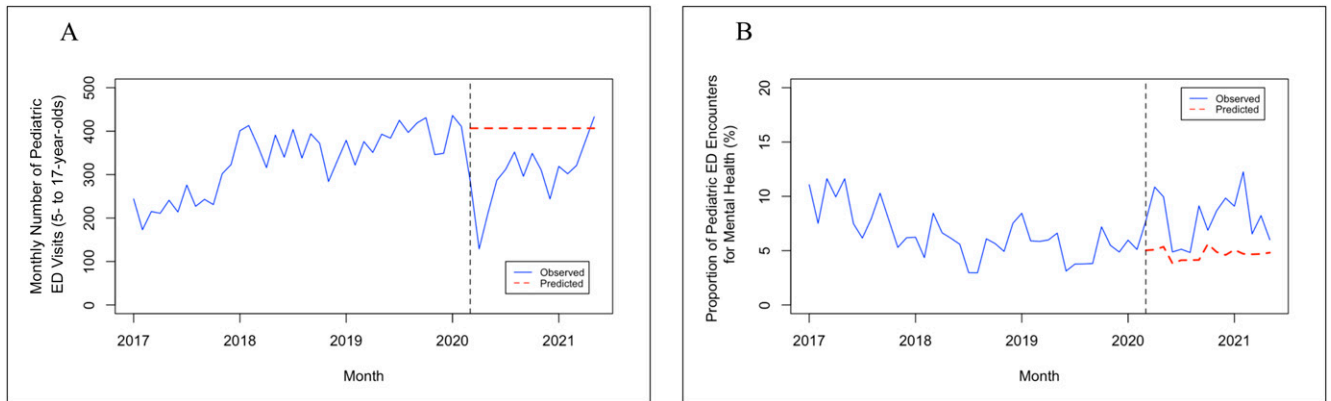

**SUPPLEMENTAL FIGURE 2** (A) Observed versus predicted number of total pediatric ED visits among 5- to 17-year-olds and (B) proportion of pediatric ED visits with a primary mental health diagnosis, January 2017 to May 2021. Each ARIMA model included visits measured at the per month level as the time interval, measured from January 2017 – May 2021. Each ARIMA model included visits measured at the per month level as the time interval, measured from January 2017 – May 2021. Panel A: Model included a non-seasonal differencing component of lag 1 and a moving average with lag of 1 for the error terms (coefficient =  $-0.51$ ; 95% CI:  $-0.76, -0.26$ ). During March – June 2020 a pulse function indicates there were  $-119$  (95% CI:  $-185, -53.5$ ) fewer ED visits each month than expected and there was an insignificant increase of 4.51 ED visits per month (95% CI:  $-11.6, 20.6$ ) from July 2020 – May 2021. Panel B: Model included a non-seasonal differencing component of lag 1, a moving average with lag of 1 for the error terms (coefficient =  $-0.65$ ; 95% CI:  $-0.94, -0.36$ ), and an autoregressive, 12-month seasonal component with a lag of 1 (coefficient =  $0.48$ ; 95% CI:  $0.17, 0.78$ ). A step function starting in March 2020 indicates the average monthly proportion of ED visits for mental health are significantly greater than expected (4.69; 95% CI:  $1.85, 7.53$ ); from March 2020 to May 2021 the slope is not significantly different than expected ( $-0.06$ ; 95% CI:  $-0.46, 0.34$ ).
